# Supplementary material for: Immunogenicity of Intradermal Versus Intramuscular BNT162b2 COVID-19 Booster Vaccine in Patients with Immune-Mediated Dermatologic Diseases: A Non-Inferiority Randomized Controlled Trial
Source: MDPI journal article supplement (doi:10.3390/vaccines12010073), 2024-01-11
Supplement: s1 [file s1]

**Supplementary materials for Immunogenicity of Intradermal Versus Intramuscular BNT162b2 COVID-19  
Booster Vaccine in Patients with Immune-Mediated Dermatologic Diseases: A Non-Inferiority Randomized  
Controlled Trial**

Chutima Seree-aphinan<sup>1,2</sup>, Ploysyne Rattanakaemakorn<sup>1</sup>, Poonkiat Suchonwanit<sup>1</sup>,  
Kunlawat Thadanipon<sup>1,3</sup>, Yanisa Ratanapokasatit<sup>1</sup>, Tanat Yongpisarn<sup>1</sup>, Kumthorn Malathum<sup>4</sup>,  
Pornchai Simaroj<sup>5</sup>, Chavachol Setthaudom<sup>6</sup>, Onchuma Lohjai<sup>6</sup>, Somsak Tanrattanakorn<sup>1</sup> and  
Kumutnart Chanprapaph<sup>1,\*†</sup>

- <sup>1</sup> Department of Medicine, Division of Dermatology, Faculty of Medicine Ramathibodi Hospital, Mahidol University, Bangkok, Thailand, 10400 chutima.se@psu.ac.th (C.S.-a.); ploysyne.rat@mahidol.ac.th (P.R.); poonkiat.suc@mahidol.ac.th (P.S.); kunlawat.tha@mahidol.edu (K.T.); yanisa.rat@mahidol.ac.th (Y.R.); tanat.yog@mahidol.ac.th (T.Y.); somsak.tan@mahidol.ac.th (S.T.)
- <sup>2</sup> Department of Internal Medicine, Division of Dermatology, Faculty of Medicine, Prince of Songkla University, Songkhla, Thailand, 90110
- <sup>3</sup> Department of Clinical Epidemiology and Biostatistics, Faculty of Medicine Ramathibodi Hospital, Mahidol University, Bangkok, Thailand, 10400
- <sup>4</sup> Department of Medicine, Division of Infectious Diseases, Faculty of Medicine Ramathibodi Hospital, Mahidol University, Bangkok, Thailand; kumthorn.mal@mahidol.ac.th, 10400
- <sup>5</sup> Department of Ophthalmology, Faculty of Medicine Ramathibodi Hospital, Mahidol University, Bangkok, Thailand; pornchai.sim@mahidol.edu, 10400
- <sup>6</sup> Immunology Laboratory, Department of Pathology, Faculty of Medicine Ramathibodi Hospital, Mahidol University, Bangkok, Thailand, 10400 chavachol.set@mahidol.ac.th (C.S.); onchuma.loh@mahidol.ac.th (O.L.)
- \* Correspondence: kumutnartp@hotmail.com, kumutnart.prb@mahidol.ac.th
- † on behalf of COVIDVAC-DERM Study Group

## **Supplement 2: Supplementary Tables and Figures**

**Table S1. Clinical characteristics of the study participants grouped by assay sensitivity evaluation result.**

|                                                                    | Immunogenicity data fulfil assay sensitivity assumption |                        | p                             |
|--------------------------------------------------------------------|---------------------------------------------------------|------------------------|-------------------------------|
|                                                                    | Yes (n=60)                                              | No (n=48)              |                               |
| Allocated to fID arm, n (%)                                        | 30 (50.0)                                               | 23 (47.9)              | 0.830 <sup>a</sup>            |
| <b>Age group, n (%)</b>                                            |                                                         |                        | 0.282 <sup>a</sup>            |
| < 65                                                               | 41 (68.3)                                               | 28 (58.3)              |                               |
| ≥ 65                                                               | 19 (31.7)                                               | 20 (41.7)              |                               |
| <b>Female, n (%)</b>                                               | 35 (58.3)                                               | 24 (50.0)              | 0.387 <sup>a</sup>            |
| <b>Immune-mediated dermatologic disease, n (%)</b>                 |                                                         |                        | 0.082 <sup>a</sup>            |
| Autoimmune bullous disease                                         | 30 (50.0)                                               | 32 (66.7)              |                               |
| Psoriasis                                                          | 30 (50.0)                                               | 16 (33.3)              |                               |
| <b>Systemic immunosuppressants used before intervention, n (%)</b> |                                                         |                        |                               |
| Prednisolone, n (%)                                                | 16 (26.7)                                               | 20 (41.7)              | 0.100 <sup>a</sup>            |
| - Dose (mg/day), median (IQR)                                      | 5.6 (5.0-12.5)                                          | 5.0 (3.1-8.8)          | 0.161 <sup>b</sup>            |
| Azathioprine, n (%)                                                | 19 (31.7)                                               | 22 (45.8)              | 0.132 <sup>a</sup>            |
| - Dose (mg/day), median (IQR)                                      | 50.0 (25.0-100.0)                                       | 62.5 (25.0-75.0)       | 0.842 <sup>b</sup>            |
| Methotrexate, n (%)                                                | 15 (25.0)                                               | 10 (20.8)              | 0.610 <sup>a</sup>            |
| - Dose (mg/week), median (IQR)                                     | 10.0 (5.0-15.0)                                         | 12.5 (10.0-15.0)       | 0.535 <sup>b</sup>            |
| Mycophenolate mofetil, n (%)                                       | 2 (3.3)                                                 | 1 (2.1)                | 0.694 <sup>a</sup>            |
| - Dose (mg/day), median (IQR)                                      | 2000.0 (1000.0-3000.0)                                  | 1000.0 (1000.0-1000.0) | 0.480 <sup>a</sup>            |
| Cyclophosphamide, n (%)                                            | 1 (1.7)                                                 | 0                      | 0.369 <sup>a</sup>            |
| - Dose (mg/day), median (IQR)                                      | 14.3 (14.3-14.3)                                        | 0                      | NA                            |
| Ciclosporin, n (%)                                                 | 4 (6.7)                                                 | 1 (2.1)                | 0.260 <sup>a</sup>            |
| - Dose (mg/day), median (IQR)                                      | 100.0 (75.0-125.0)                                      | 50.0 (50.0-50.0)       | 0.263 <sup>b</sup>            |
| Sulfasalazine n (%)                                                | 5 (8.3)                                                 | 1 (2.1)                | 0.159 <sup>a</sup>            |
| - Dose (mg/day), median (IQR)                                      | 3000.0 (2000.0-3000.0)                                  | 2000.0 (2000.0-2000.0) | 0.527 <sup>b</sup>            |
| Leflunomide, n (%)                                                 | 1 (1.7)                                                 | 2 (4.2)                | 0.432 <sup>a</sup>            |
| - Dose (mg/day), median (IQR)                                      | 20.0 (20.0-20.0)                                        | 20.0 (20.0-20.0)       | 1.000 <sup>b</sup>            |
| Recent rituximab use <sup>c</sup> , n (%)                          | 4 (6.7)                                                 | 2 (4.2)                | 0.573 <sup>a</sup>            |
| Interleukin 17/interleukin 23 inhibitors <sup>d</sup> , n (%)      | 15 (25.0)                                               | 3 (6.3)                | <b>0.009<sup>a*</sup></b>     |
| Tumour necrotic factor inhibitors <sup>d</sup> , n (%)             | 1 (2.1)                                                 | 0 (0)                  | 0.261 <sup>a</sup>            |
| No systemic immunosuppressants used, n (%)                         | 11 (18.3)                                               | 7 (14.6)               | 0.603 <sup>a</sup>            |
| <b>Interval between third and fourth dose (days), median (IQR)</b> | 151.0 (128.5-183.0)                                     | 152.0 (136.0-180.5)    | 0.980 <sup>b</sup>            |
| <b>Previous COVID-19 vaccination, n (%)</b>                        |                                                         |                        |                               |
| Primary series                                                     |                                                         |                        | 0.373 <sup>a</sup>            |
| - Viral vector vaccines                                            | 42 (70.0)                                               | 36 (75.0)              |                               |
| - Inactivated vaccines                                             | 13 (21.7)                                               | 5 (10.4)               |                               |
| - Heterologous vaccines                                            | 4 (6.7)                                                 | 6 (12.5)               |                               |
| - mRNA vaccines                                                    | 1 (1.6)                                                 | 1 (2.1)                |                               |
| Third dose                                                         |                                                         |                        | 0.260 <sup>a</sup>            |
| - mRNA vaccines                                                    | 56 (93.3)                                               | 4 (97.9)               |                               |
| - Viral vector vaccines                                            | 4 (6.7)                                                 | 1 (2.1)                |                               |
| <b>Baseline SARS-CoV-2-specific immunity levels, median (IQR)</b>  |                                                         |                        |                               |
| Anti-SARS-CoV-2 S1 RBD IgG (bau/ml)                                | 263.3 (121.2-691.8)                                     | 549.5 (258.6-1817.4)   | <b>0.023<sup>b*</sup></b>     |
| - % participants tested negative (< 7.1 bau/ml)                    | 2 (3.3)                                                 | 1 (2.1)                | 0.694 <sup>a</sup>            |
| IFN-γ measured from SARS-CoV-2 IGRA (mIU/ml)                       | 662.5 (217.9-1519.6)                                    | 2313.7 (722.7-5546.4)  | <b>&lt;0.001<sup>b*</sup></b> |
| - % participants tested negative (≤ 200 mIU/ml)                    | 15 (25.0)                                               | 3 (6.3)                | <b>0.009<sup>a*</sup></b>     |
| <b>Immunogenicity outcome estimates</b>                            |                                                         |                        |                               |
| Anti-SARS-CoV-2 S1 RBD IgG (bau/ml)                                |                                                         |                        |                               |
| - Week 4                                                           | 2204.6 (952.5-4406.1)                                   | 1973.9 (692.5-3428.6)  | 0.314 <sup>b</sup>            |
| - Week 12                                                          | 1143.9 (488.8-2793.7)                                   | 937.9 (377.6-1736.9)   | 0.105 <sup>b</sup>            |
| - Week 24                                                          | 651.4 (255.1-1482.2)                                    | 827.0 (252.0-1638.8)   | 0.906 <sup>b</sup>            |
| SARS-CoV-2 IGRA-derived IFN-γ (mIU/ml)                             |                                                         |                        |                               |
| - Week 12                                                          | 2225.2 (1274.0-4605.0)                                  | 1622.6 (384.8-3362.7)  | 0.062 <sup>b</sup>            |
| - Week 24                                                          | 1737.0 (628.1-3568.5)                                   | 2507.5 (805.3-5394.2)  | 0.279 <sup>b</sup>            |

\* p < 0.05

**a** p-value from Chi square or Fisher exact tests, **b** p-value from Mann-Whitney tests, **c** the most recent course of rituximab treatment received by all participants was administered as follows: two doses of 1000-mg rituximab infusions separated by two weeks. Recent use was defined as rituximab-to-vaccination interval < 9 months, **d** Biologics were prescribed with the standard dosage for psoriasis. **Abbreviations:** bau, binding antibody unit; COVID-19, coronavirus disease 2019; fID, fractionated intradermal; IFN-γ, interferon gamma; IGRA, IFN-γ release assay; IQR, interquartile range; IU, international unit; ml, millilitres; NA, not applicable; SARS-CoV-2; severe acute respiratory syndrome coronavirus 2; sIM: standard intramuscular.

**Table S2. Mean and 95% confidence interval of the covariates' coefficients from multivariate logistic analysis which showed statistically significant associations with the immunogenicity outcomes.**

| Analysis types | Outcome analysed                   | Covariates                                                  | Mean (95%CI)            | p      |
|----------------|------------------------------------|-------------------------------------------------------------|-------------------------|--------|
| ITT            | Humoral immunogenicity at Week 4   | Pre-intervention anti-SARS-CoV-2 IgG                        | 0.52<br>(0.43, 0.60)    | <0.001 |
|                | Humoral immunogenicity at Week 12  | anti-SARS-CoV-2 IgG at Week 4                               | 0.79<br>(0.64, 0.94)    | <0.001 |
|                | Humoral immunogenicity at Week 24  | anti-SARS-CoV-2 IgG at Week 12                              | 0.80<br>(0.66, 0.94)    | <0.001 |
|                | Cellular immunogenicity at Week 12 | Pre-intervention SARS-CoV-2-specific IFN- $\gamma$ response | 0.41<br>(0.28, 0.53)    | <0.001 |
|                | Cellular immunogenicity at Week 12 | The doses of mRNA vaccines received prior to enrolment      | -0.52<br>(-0.96, -0.07) | 0.023  |
|                | Cellular immunogenicity at Week 24 | SARS-CoV-2-specific IFN- $\gamma$ response at Week 12       | 0.67<br>(0.50, 0.84)    | <0.001 |
| PP             | Humoral immunogenicity at Week 4   | Pre-intervention anti-SARS-CoV-2 IgG                        | 0.60<br>(0.52, 0.69)    | <0.001 |
|                | Humoral immunogenicity at Week 12  | anti-SARS-CoV-2 IgG at Week 4                               | 0.76<br>(0.58, 0.94)    | <0.001 |
|                | Humoral immunogenicity at Week 24  | anti-SARS-CoV-2 IgG at Week 12                              | 0.87<br>(0.72, 1.02)    | <0.001 |
|                | Cellular immunogenicity at Week 12 | Pre-intervention SARS-CoV-2-specific IFN- $\gamma$ response | 0.32<br>(0.17, 0.47)    | <0.001 |
|                | Cellular immunogenicity at Week 24 | Pre-intervention SARS-CoV-2-specific IFN- $\gamma$ response | 0.50<br>(0.12, 0.88)    | 0.012  |

**Abbreviations:** CI, confidence interval; IFN- $\gamma$ , interferon gamma; ITT, intention-to-treat; PP, per-protocol; SARS-CoV-2; severe acute respiratory syndrome coronavirus 2; sIM: standard intramuscular.

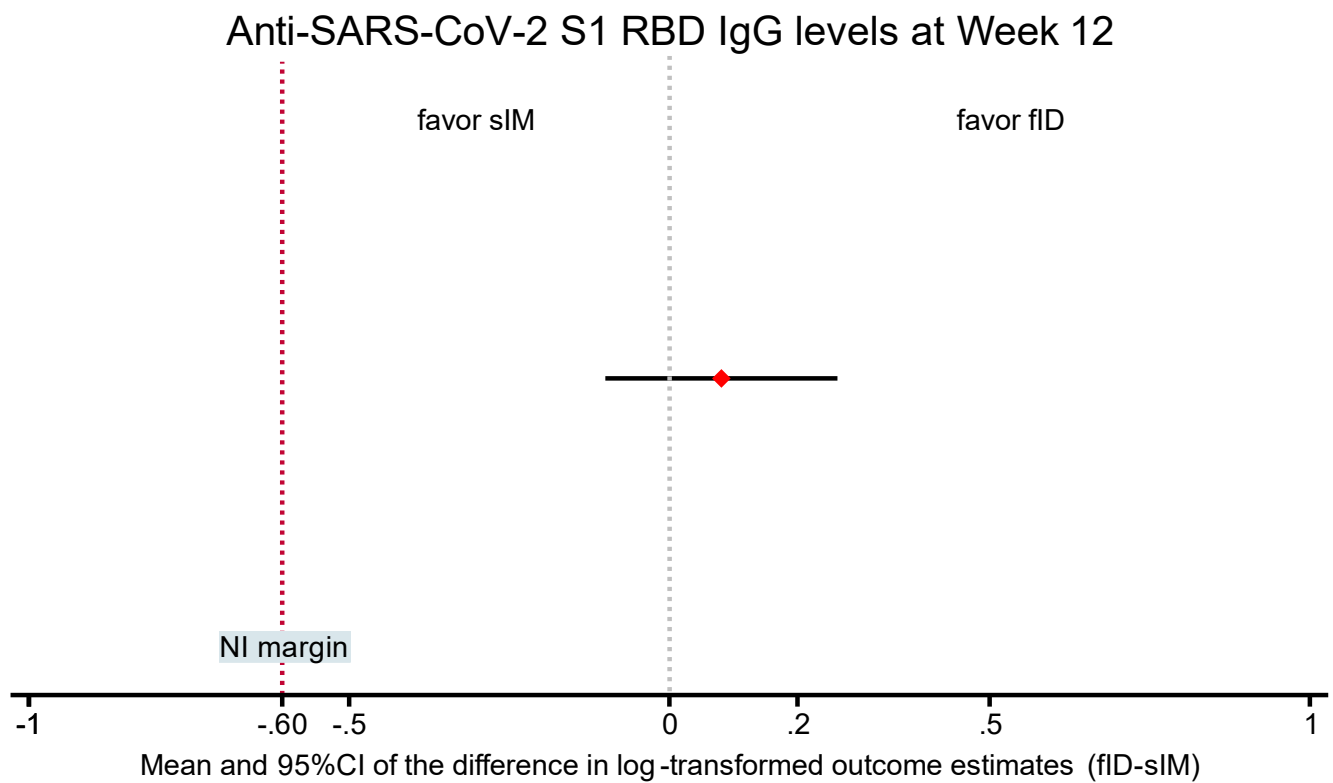

**Figure S1.** Intention-to-treat analysis of mean difference in the secondary humoral immunogenicity outcome estimates; anti-SARS-COV-2 IgG level 12-week post-intervention.

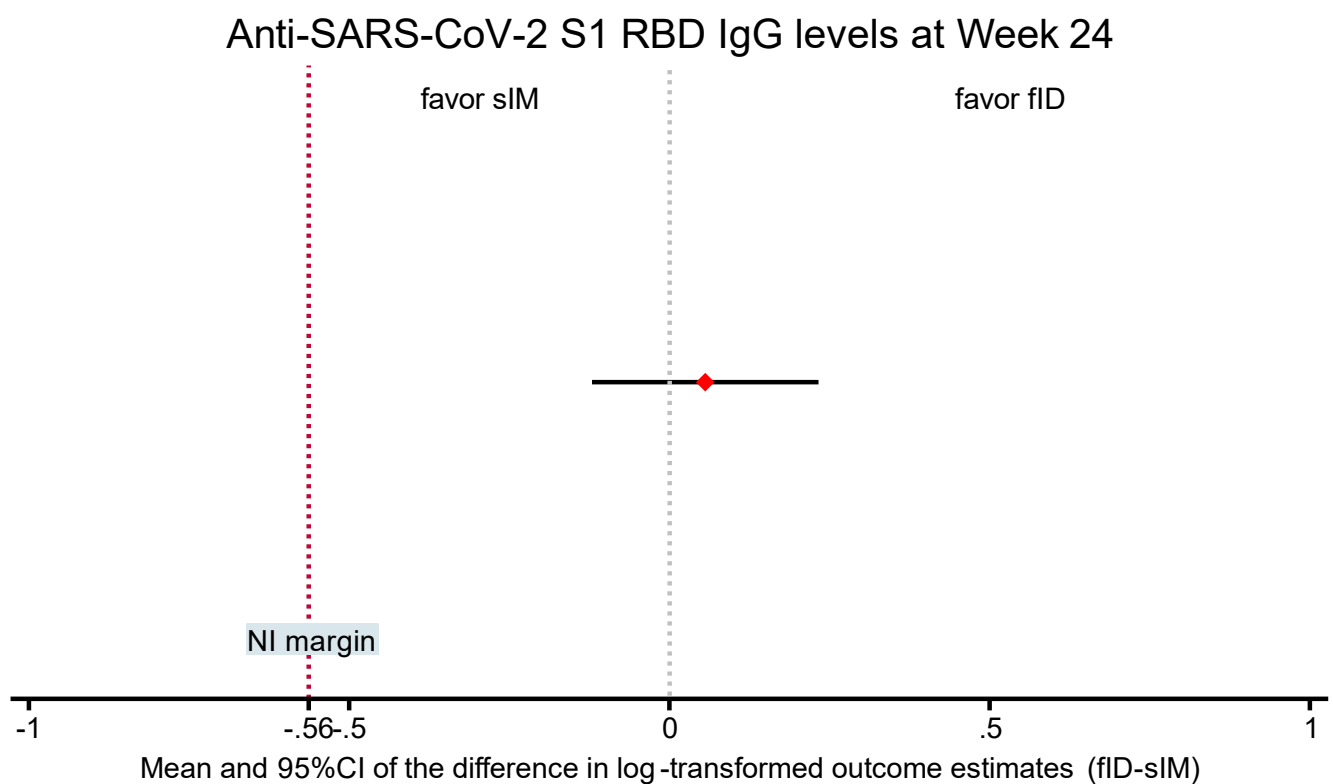

**Figure S2.** Intention-to-treat analysis of mean difference in the secondary humoral immunogenicity outcome estimates; anti-SARS-COV-2 IgG level 24-week post-intervention.

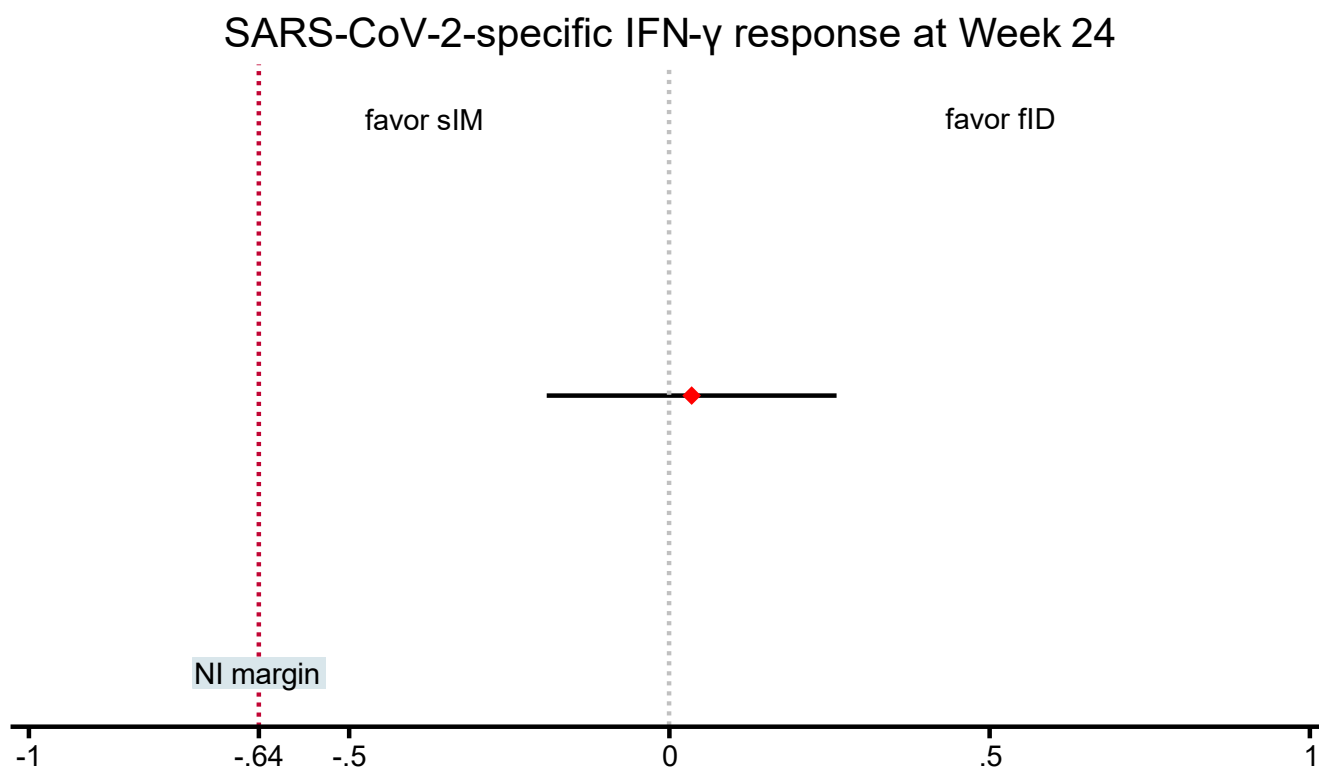

**Figure S3.** Intention-to-treat analysis of mean difference in the secondary cellular immunogenicity outcome estimates; IGRA-derived interferon gamma levels at Week 24.

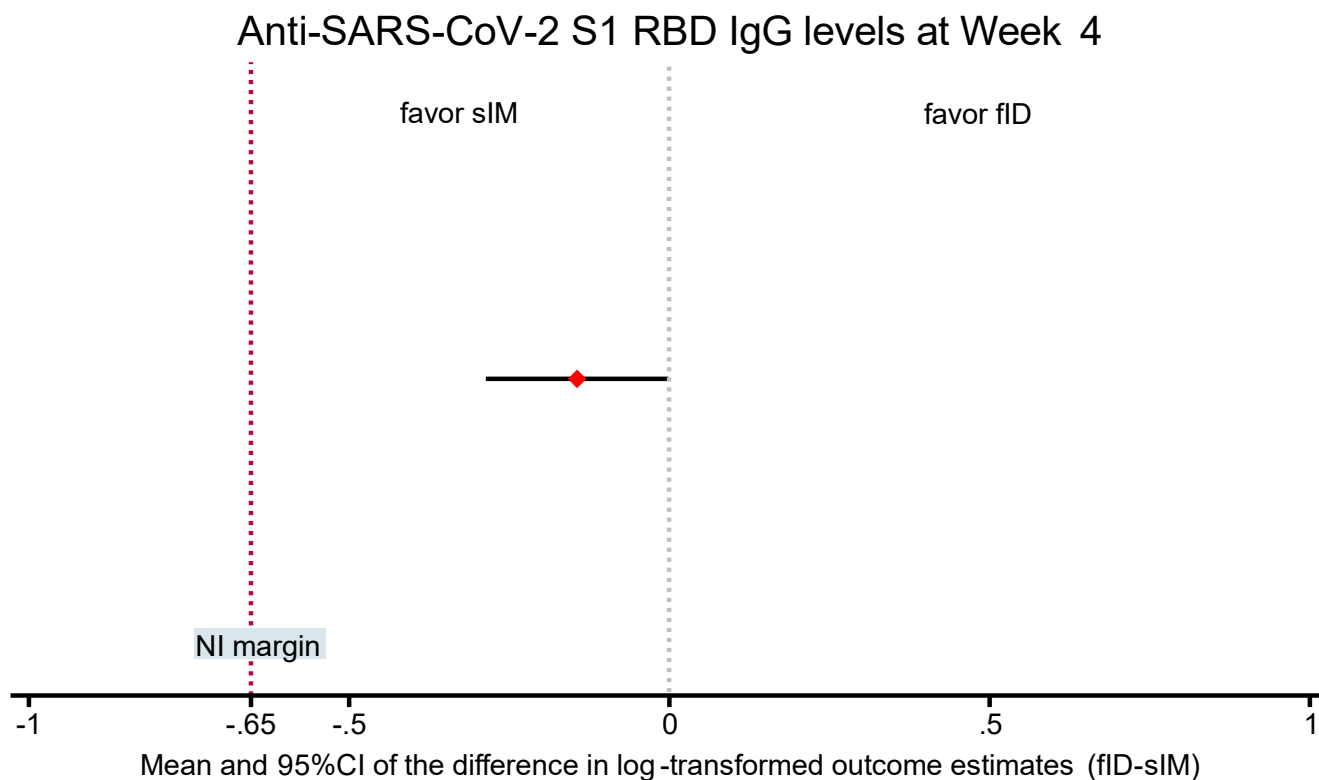

**Figure S4.** Per-protocol analysis of mean difference in the primary humoral immunogenicity outcome estimates.

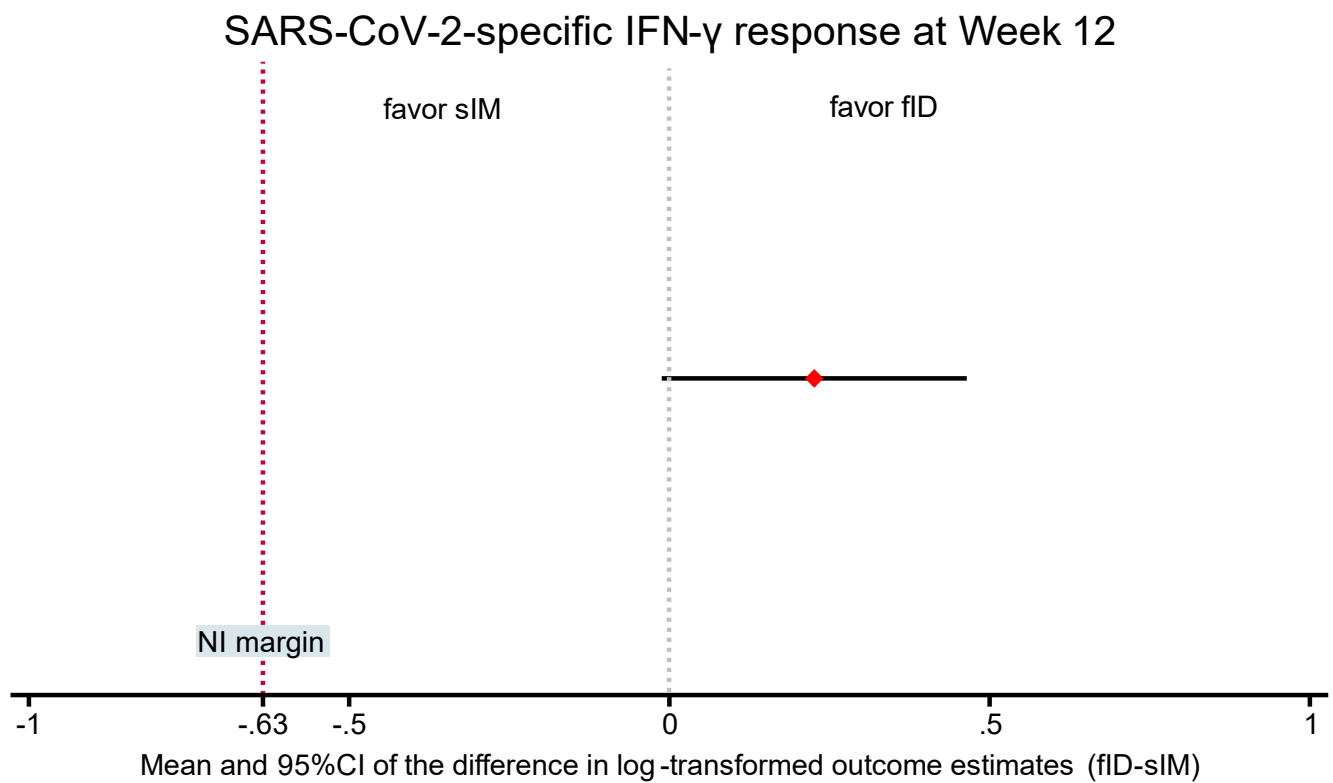

**Figure S5.** Per-protocol analysis of mean difference in the primary cellular immunogenicity outcome estimates.

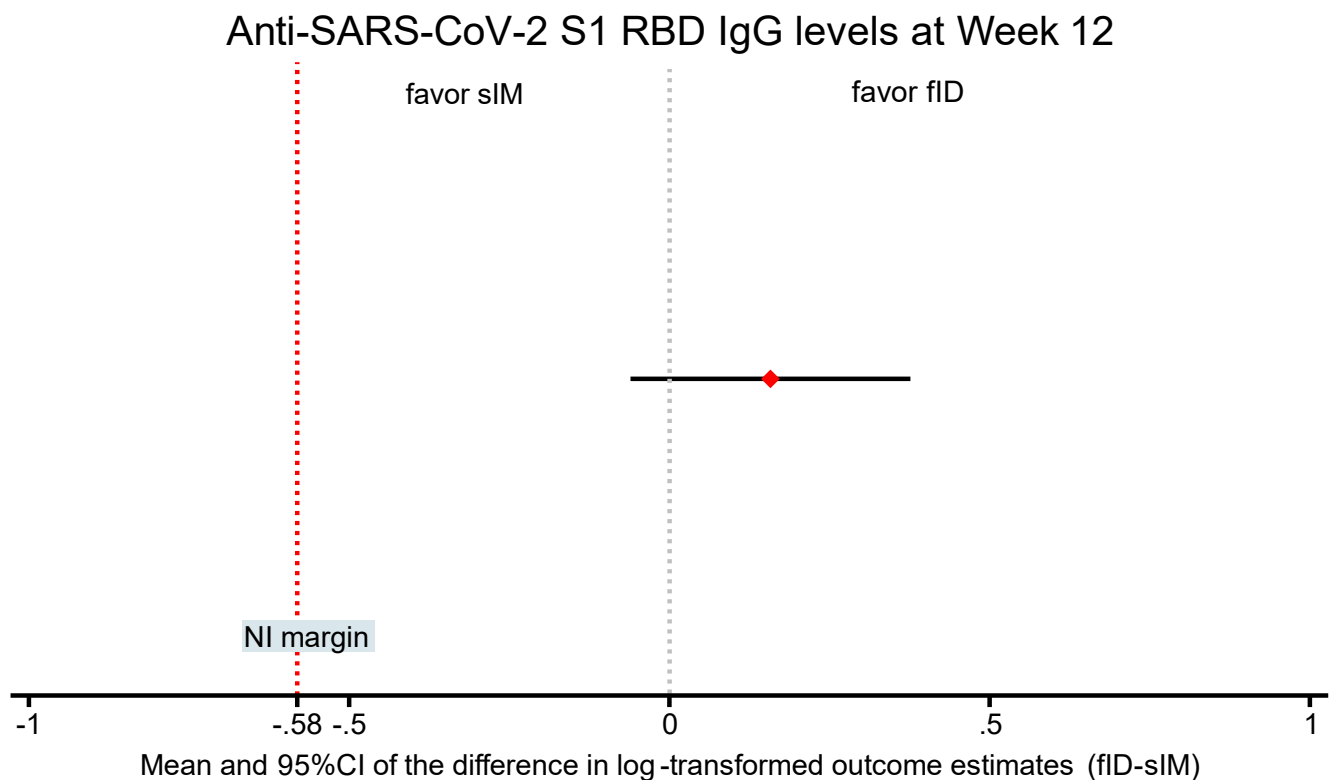

**Figure S6.** Per-protocol analysis of mean difference in the secondary humoral immunogenicity outcome estimates; anti-SARS-COV-2 IgG level 12-week post-intervention.

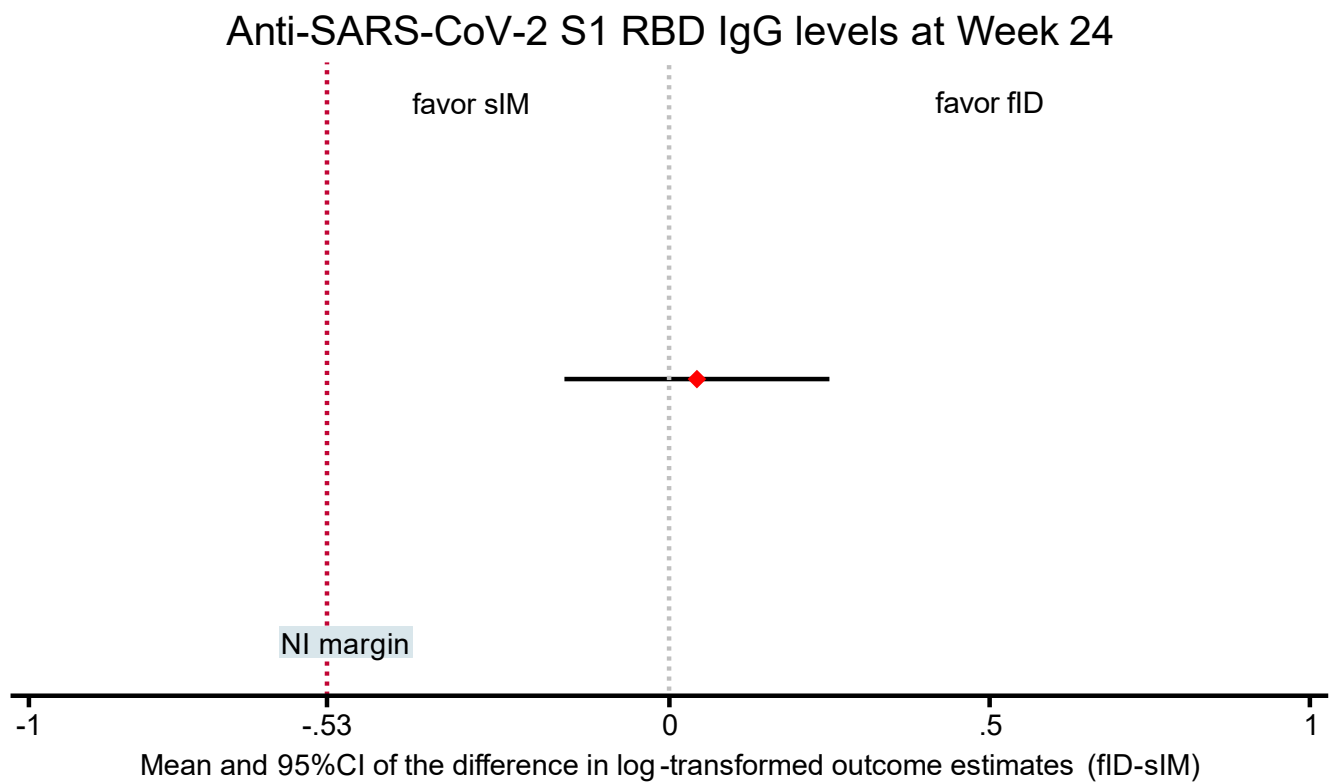

**Figure S7.** Per-protocol analysis of mean difference in the secondary humoral immunogenicity outcome estimates; anti-SARS-COV-2 IgG level 24-week post-intervention.

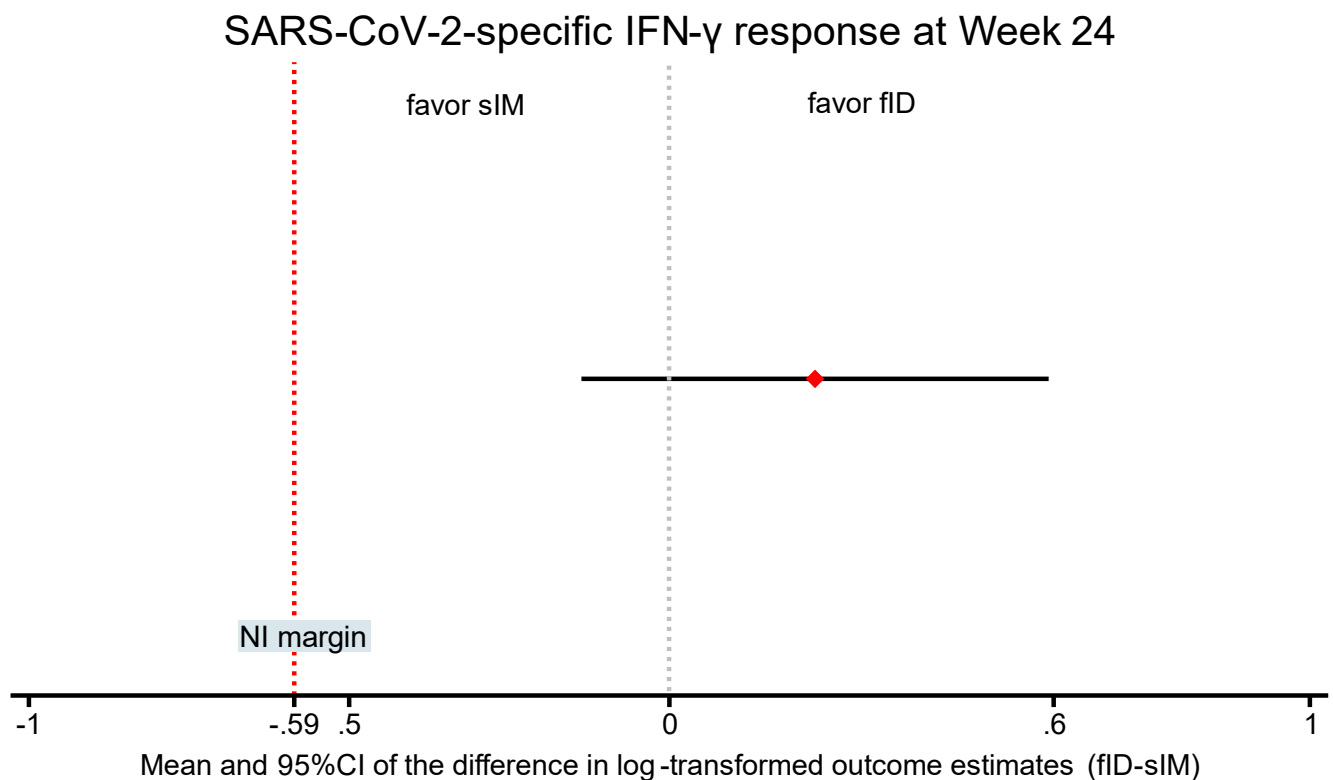

**Figure S8.** Per-protocol analysis of mean difference in secondary cellular immunogenicity outcome estimates; IGRA-derived interferon gamma levels at Week 24.
